# Supplementary material for: Quantitative Proteomic (iTRAQ) Analysis of 1st Trimester Maternal Plasma Samples in Pregnancies at Risk for Preeclampsia
Source: Hindawi journal article supplement (doi:10.1155/2012/305964), 2012-01-01
Supplement: f1 [file 305964.f1.xlsx]

## Sheet: Sheet1
										Log10
	Original data																	%variation from mean					Average % variation										Freq distribution		% cumulative freq
Proteins	PE (115:114)	Nor (116:114)	PE(117:114)	PE (115:116)	Nor (114:116)	PE (117:116)		PE (115:114)	Nor (116:114)	PE(117:114)	PE (115:116)	Nor (114:116)	PE (117:116)			PE (115:114)	Nor (116:114)	PE(117:114)	PE (115:116)	Nor (114:116)	PE (117:116)		PE	Nor								Freq category	PE	Nor	PE	Nor
Complement C4-A precursor	0.8236	0.9488	0.851	0.8779	1.0539	0.9103		-0.0842837	-0.0228253	-0.0700704	-0.056555	0.0227994	-0.0408155			11.0215	2.05242	10.3663	8.96575	2.05016	8.04453		9.9936	2.05129								10	47	64	73.4375	100
Fibrinogen Fragment D	1.4971	1.0035	1.4867	1.41	0.9965	1.4962		0.175251	0.00151738	0.172223	0.149219	-0.0015227	0.17499			14.932	0.381845	13.8631	11.6117	0.382051	13.536		13.2718	0.381948								20	16	0	98.4375	100
Fibrinogen, alpha polypeptide isoform alpha-E preproprotein	1.1124	0.9757	1.1437	1.1501	1.0249	1.1883		0.046261	-0.0106837	0.0583121	0.0607356	0.0106815	0.0749261			2.03301	0.838262	2.47194	2.76331	0.838368	3.52963		2.39816	0.838315								30	1	0	100	100
C Chain C, Crystal Structure Of Fibrinogen	1.1332	1.1216	1.1219	1.0264	0.8916	1.0138		0.0543066	0.049838	0.0499541	0.0113166	-0.0498299	0.00595229			2.83757	5.21391	1.63614	2.17859	5.21278	3.36776		2.50808	5.21334								40	0	0	100	100
Clusterin isoform 2	1.4957	1.0317	1.4356	1.4134	0.9693	1.4306		0.174844	0.0135534	0.157033	0.150265	-0.0135418	0.155518			14.8914	1.58545	12.3441	11.7163	1.58396	11.5888		13.3038	1.58471								50	0	0	100	100
Apolipoprotein A-I	1.5373	1.0679	1.4962	1.4512	0.9364	1.4184		0.186759	0.0285306	0.17499	0.161727	-0.0285386	0.151799			16.0828	3.08317	14.1397	12.8625	3.08364	11.2169		14.4726	3.0834								60	0	0	100	100
Serum Albumin	1.1184	0.976	1.1728	1.1719	1.0246	1.2214		0.0485972	-0.0105502	0.069224	0.0688906	0.0105544	0.0868579			2.26663	0.824911	3.56312	3.5788	0.825654	4.72281		2.92272	0.825282								70	0	0	100	100
Fibronectin	1.3373	1.0679	1.3962	1.3512	0.9364	1.3184		0.126229	0.0285306	0.144948	0.13072	-0.0285386	0.120047			10.0298	3.08317	11.1355	9.76171	3.08364	8.04174		9.89575	3.0834								80	0	0	100	100
Prothrombin	0.8919	1.0167	0.9032	0.8877	0.9835	0.8951		-0.0496838	0.00719282	-0.0442161	-0.0517338	-0.00722564	-0.0481284			7.56147	0.94939	7.78088	8.48363	0.952345	8.77583		8.02255	0.950867								90	0	0	100	100
S-protein precursor	1.1635	1.0105	1.259	1.1678	0.9896	1.2641		0.0657664	0.00453632	0.100026	0.0673685	-0.00454031	0.101781			3.98355	0.683739	6.6433	3.42659	0.683813	6.21516		3.70507	0.683776								100	0	0	100	100
Apolipoprotein A-IV precursor	0.7287	1.0217	0.7119	0.7209	0.9787	0.7065		-0.137451	0.00932339	-0.147581	-0.142125	-0.00935041	-0.150888			16.3382	1.16245	18.1174	17.5228	1.16482	19.0518		16.9305	1.16363								>100	0	0	100	100
Fibulin 1 precursor	0.9968	0.9351	1.067	1.0749	1.0694	1.1486		-0.00139197	-0.0291419	0.0281644	0.0313681	0.0291402	0.0601688			2.73228	2.68409	0.542834	0.173448	2.68424	2.0539		1.45286	2.68416								Total	64	64
Paraoxonase 1	1.1672	1.0022	1.1785	1.1801	0.9978	1.1785		0.0671453	0.000954398	0.0713296	0.0719188	-0.0009565	0.0713296			4.12144	0.325547	3.77368	3.88163	0.325431	3.16997		4.00154	0.325489
Fibronectin	0.9946	0.9726	1.0021	1.0413	1.0282	1.0529		-0.00235155	-0.0120657	0.000911062	0.0175759	0.0120776	0.0223871			2.82824	0.976466	3.26817	1.55267	0.977979	1.72427		2.19045	0.977222
Apolipoprotein E precursor	0.7467	1	0.7223	0.7535	1	0.7332		-0.126854	0	-0.141282	-0.122917	0	-0.134778			15.2785	0.230108	17.4875	15.6019	0.229781	17.4407		15.4402	0.229944
Ceruloplasmin precursor	0.6879	0.9315	0.7112	0.7454	1.0735	0.7745		-0.162475	-0.0308171	-0.148008	-0.127611	0.030802	-0.110979			18.8406	2.85161	18.1601	16.0713	2.85042	15.0608		17.4559	2.85102
Inter-alpha-trypsin inhibitor family heavy chain-related protein	1.1225	0.9627	1.1739	1.165	1.0387	1.2486		0.0501863	-0.016509	0.0696311	0.0663259	0.0164901	0.0964233			2.42555	1.4208	3.60383	3.32234	1.41923	5.67935		2.87394	1.42001
Pregnancy zone protein	1.1406	1.0742	1.0512	1.0784	0.9309	0.9973		0.0571334	0.0310851	0.0216854	0.0327799	-0.031097	-0.00117418			3.12025	3.33862	1.19074	0.0322667	3.33948	4.0804		1.57626	3.33905
Serine proteinase inhibitor	1.0056	0.934	1.0715	1.1071	1.0707	1.1635		0.00242526	-0.0296531	0.0299922	0.0441869	0.0296678	0.0657664			2.35056	2.7352	0.360058	1.10843	2.737	2.61365		1.72949	2.7361
gi|33451	0.6172	0.9787	0.6365	0.6347	1.0218	0.6599		-0.209574	-0.00935041	-0.196202	-0.197432	0.0093659	-0.180522			23.5505	0.704934	22.9794	23.0534	0.706809	22.0152		23.3019	0.705871
Complement C1s Protease	0.9749	0.956	1.0189	1.0362	1.046	1.0817		-0.0110399	-0.0195421	0.00813156	0.0154436	0.0195317	0.0341068			3.69708	1.7241	2.54612	1.7659	1.72339	0.552301		2.73149	1.72375
Humanized Fab D3h44	0.9991	0.9473	1.0997	1.0729	1.0556	1.17		-0.000391041	-0.0235125	0.0412742	0.0305592	0.0234994	0.0681859			2.63219	2.12114	0.768147	0.25433	2.12016	2.8556		1.44326	2.12065
Apolipoprotein C-Iii	0.886	0.956	0.9324	0.9372	1.046	0.9748		-0.0525663	-0.0195421	-0.0303977	-0.0281677	0.0195317	-0.0110845			7.84971	1.7241	6.39905	6.12703	1.72339	5.07143		6.98837	1.72375
Bowman-Birk Type Protease	1.161	1.1333	1.1332	1.0368	0.8824	1.0157		0.0648322	0.0543449	0.0543066	0.015695	-0.0543345	0.00676545			3.89014	5.6646	2.07138	1.74076	5.66323	3.28644		2.81545	5.66391
Angiotensinogen preproprotein	1.4189	0.9682	1.4439	1.4645	1.0328	1.498		0.151952	-0.0140349	0.159537	0.165689	0.0140162	0.175512			12.6021	1.17338	12.5944	13.2587	1.17184	13.5882		12.9304	1.17261
Human Serum Amyloid P Component	0.8925	0.9815	0.9809	0.9238	1.0188	1.0177		-0.0493918	-0.0081097	-0.00837527	-0.034422	0.00808894	0.00761977			7.53226	0.580862	4.1968	6.75246	0.579112	3.20101		7.14236	0.579987
Galectin 3 binding protein	1.4016	0.9698	1.4538	1.4457	1.0312	1.4031		0.146624	-0.0133178	0.162505	0.160078	0.0133429	0.147089			12.0693	1.10167	12.8912	12.6976	1.10451	10.7459		12.3834	1.10309
gi|22760231	1.1082	0.956	1.1823	1.187	1.0461	1.2704		0.0446181	-0.0195421	0.0727277	0.0744507	0.0195732	0.10394			1.86873	1.7241	3.91349	4.13482	1.72754	6.43106		3.00177	1.72582
Plasminogen	1.5483	0.9274	1.5131	1.5512	1.0783	1.5063		0.189855	-0.0327329	0.179868	0.190668	0.0327396	0.177911			16.3924	3.04318	14.6275	15.7565	3.04418	13.8282		16.0745	3.04368
Ldl Receptor-Binding Domain Of Human Apolipoprotein E	0.8746	0.8962	0.9294	0.9982	1.1158	1.0647		-0.0581905	-0.0475951	-0.0317973	-0.000782434	0.0475864	0.0272273			8.41214	4.5294	6.53901	3.3885	4.52885	1.24026		5.90032	4.52913
Human Complement Component	1.1286	0.9986	1.0519	1.1581	1.0014	1.0719		0.05254	-0.000608438	0.0219745	0.0637461	0.000607587	0.0301543			2.66092	0.169264	1.16183	3.06435	0.169023	0.947557		2.86264	0.169143
Histidine-rich glycoprotein precursor	1.0825	0.9804	1.1299	1.1179	1.02	1.1697		0.0344279	-0.0085967	0.05304	0.048403	0.00860017	0.0680745			0.849706	0.629562	1.94473	1.53004	0.630236	2.84446		1.18987	0.629899
Complement factor	0.9746	1.057	1.0924	0.9342	0.946	1.0461		-0.0111736	0.024075	0.0383817	-0.0295601	-0.0241089	0.0195732			3.71044	2.63761	0.478894	6.26627	2.64067	2.00566		4.98836	2.63914
gi|27597169	1.1493	0.9992	1.2199	1.1726	1.0008	1.2358		0.0604334	-0.000347575	0.0863242	0.0691499	0.000347297	0.0919482			3.45026	0.19535	5.27315	3.60473	0.195052	5.23183		3.5275	0.195201
FETUA_HUMAN Alpha-2-HS-glycoprotein precursor	0.9656	0.9564	1.009	1.0236	1.0456	1.0667		-0.0152027	-0.0193604	0.00389117	0.0101303	0.0193656	0.0280423			4.11336	1.70594	2.97016	2.29723	1.70678	1.15875		3.20529	1.70636
Pregnancy-specific beta-1 glycoprotein C2	0.8093	0.9994	0.8159	0.8157	1.0006	0.8213		-0.0918905	-0.000260655	-0.0883631	-0.0884695	0.000260499	-0.0854982			11.7821	0.204042	12.1956	12.1572	0.203731	12.5128		11.9697	0.203887
Transferrin	1.3086	1.007	1.3514	1.3102	0.993	1.3512		0.116807	0.00302947	0.130784	0.117338	-0.00305075	0.13072			9.08761	0.533055	9.71912	8.4235	0.534856	9.10898		8.75556	0.533956
Fibrinogen, gamma chain isoform gamma-B precursor	1.1169	0.9451	1.1146	1.1883	1.0581	1.1875		0.0480143	-0.0245222	0.047119	0.0749261	0.0245267	0.0746336			2.20834	2.22212	1.35263	4.18236	2.22289	3.50038		3.19535	2.2225
A Chain A, Human Complement Component C3	1.2001	1.1871	1.1907	1.0271	0.8424	0.9996		0.0792174	0.0744873	0.0758024	0.0116127	-0.0744816	-0.000173753			5.32866	7.67884	4.22096	2.14898	7.67795	3.98036		3.73882	7.67839
Complex Of The Catalytic Domain Of Human Plasmin And Streptokinase	0.9518	0.9237	1	1.0479	1.0825	1.0976		-0.0214543	-0.0344691	0	0.0203198	0.0344279	0.0404441			4.73851	3.2168	3.35928	1.27827	3.21301	0.0814254		3.00839	3.2149
Pregnancy specific beta-1-glycoprotein 9	1.0102	0.8972	1.0411	1.1612	1.1146	1.1715		0.00440736	-0.0471107	0.0174924	0.064907	0.047119	0.0687423			2.15235	4.48097	1.61003	3.18045	4.48212	2.91124		2.6664	4.48154
1FZA|B Chain B	1.1493	0.9992	1.2199	1.1726	1.0008	1.2358		0.0604334	-0.000347575	0.0863242	0.0691499	0.000347297	0.0919482			3.45026	0.19535	5.27315	3.60473	0.195052	5.23183		3.5275	0.195201
Coagulation factor II preproprotein	0.9666	1.0237	0.9385	0.9633	0.9768	0.9266		-0.0147532	0.0101727	-0.0275657	-0.0162384	-0.0101943	-0.0331077			4.06841	1.24738	6.11585	4.9341	1.24922	7.27375		4.50125	1.2483
Complement component 1	0.871	1.0831	0.8561	0.8155	0.9233	0.804		-0.0599818	0.0346686	-0.0674755	-0.088576	-0.0346572	-0.094744			8.59127	3.69696	10.1068	12.1679	3.6955	13.4374		10.3796	3.69623
Human Gamma-Thrombin	0.7412	0.8196	0.8843	0.92	1.22	1.0848		-0.130065	-0.0863981	-0.0534004	-0.0362122	0.0863598	0.0353497			15.5995	8.4097	8.69931	6.93147	8.4062	0.428017		11.2655	8.40795
HUMAN Pregnancy-specific beta-1-glycoprotein 4 precursor	0.9783	0.9903	1.0317	1	1.0098	1.0512		-0.00952795	-0.00423322	0.0135534	0	0.00423537	0.0216854			3.54588	0.193215	2.00393	3.31025	0.193755	1.79445		3.42807	0.193485
Vitronectin precursor	1.0586	1.0179	1.0654	1.0673	0.9824	1.0645		0.0247319	0.00770511	0.0275127	0.0282865	-0.00771165	0.0271457			0.119895	1.00062	0.608006	0.481604	1.00095	1.24842		0.300749	1.00078
Prealbumin	1.1757	0.9091	1.1657	1.3158	1.1	1.2943		0.0702965	-0.0413883	0.0665868	0.11919	0.0413927	0.112035			4.43657	3.90873	3.2994	8.60873	3.90949	7.24051		6.52265	3.90911
Complement component 9	1.0821	1.1075	0.9948	0.9969	0.9029	0.9127		0.0342674	0.0443437	-0.00226422	-0.0013484	-0.0443603	-0.0396719			0.833656	4.66448	3.5857	3.4451	4.66582	7.93018		2.13938	4.66515
Haptoglobin	0.9769	1.0101	0.9866	0.9879	0.99	0.9912		-0.0101499	0.00436437	-0.00585889	-0.00528701	-0.00436481	-0.00383871			3.60807	0.666545	3.94516	3.83896	0.666262	4.34686		3.72351	0.666403
Human Platelet Factor 4	1.0539	1.0806	1.0496	0.9864	0.9254	0.9869		0.0227994	0.033665	0.0210238	-0.00594694	-0.0336705	-0.00572685			0.313144	3.5966	1.25689	3.90495	3.59683	4.53567		2.10905	3.59672
Glycosylphosphatidylinositol phospholipase D	1.2252	1.0044	1.2683	1.2764	0.9956	1.3015		0.088207	0.0019067	0.103222	0.105987	-0.00191511	0.114444			6.22761	0.420778	6.96292	7.28842	0.421292	7.48143		6.75802	0.421035
Complement component 4 binding protein	1.5473	1.0679	1.5462	1.5412	0.9364	1.5184		0.189575	0.0285306	0.189266	0.187859	-0.0285386	0.181386			16.3644	3.08317	15.5673	15.4756	3.08364	14.1756		15.92	3.0834
Platelet factor 4 (chemokine (C-X-C motif)	1.2254	1.1724	1.096	1.0687	0.853	0.9495		0.0882779	0.0690758	0.0398106	0.0288558	-0.069051	-0.022505			6.2347	7.13769	0.62178	0.424674	7.13488	6.21349		3.32969	7.13628
EGF-containing fibulin-like extracellular matrix protein 1	1.1788	0.9445	1.3181	1.2707	1.0588	1.4048		0.0714401	-0.024798	0.119948	0.104043	0.0248139	0.147614			4.55093	2.2497	8.63556	7.09405	2.25161	10.7985		5.82249	2.25065
Apolipoprotein C-I	1.0171	0.9687	1.0709	1.0717	1.0323	1.1194		0.00736365	-0.0138107	0.0297489	0.0300732	0.0138059	0.0489853			1.85672	1.15096	0.384384	0.302932	1.15081	0.935546		1.07983	1.15089
Fibrinogen, beta chain preproprotein	1.0251	0.9815	1.0911	1.0592	1.0189	1.1261		0.0107662	-0.0081097	0.0378646	0.024978	0.00813156	0.051577			1.51646	0.580862	0.42718	0.812457	0.583375	1.19471		1.16446	0.582119
Immunoglobulin lambda light chain VLJ region	1.1215	0.8881	1.1827	1.288	1.1261	1.3453		0.0497993	-0.0515381	0.0728746	0.109916	0.051577	0.128819			2.38684	4.92371	3.92818	7.68133	4.92791	8.91893		5.03409	4.92581
Hemopexin	1.5373	1.0679	1.4962	1.4512	0.9364	1.4184		0.186759	0.0285306	0.17499	0.161727	-0.0285386	0.151799			16.0828	3.08317	14.1397	12.8625	3.08364	11.2169		14.4726	3.0834
Immunoglobulin J chain	0.8288	1.0014	0.8209	0.8334	0.9986	0.8369		-0.0815503	0.000607587	-0.0857097	-0.0791465	-0.000608438	-0.0773264			10.7481	0.290866	11.9303	11.2249	0.290625	11.6956		10.9865	0.290746
Delta globin	0.752	0.9079	0.7103	0.7211	1.1014	0.6818		-0.123782	-0.041962	-0.148558	-0.142005	0.0419451	-0.166343			14.9713	3.96609	18.2151	17.5107	3.96473	20.5973		16.241	3.96541
immunoglobulin heavy chain constant region gamma 1	1.0392	0.9996	1.14	1.0534	1.0004	1.1568		0.0166991	-0.000173753	0.0569049	0.0225933	0.000173683	0.0632583			0.92317	0.212732	2.33121	1.05092	0.212413	2.36284		0.987047	0.212573
Factor H	1.2439	1.0304	1.0777	1.2256	0.9705	1.0561		0.0947855	0.0130059	0.0324979	0.0883488	-0.0130045	0.023705			6.88546	1.53069	0.109487	5.52462	1.53023	1.59248		6.20504	1.53046
Immunoglobulin kappa light chain	1.288	1.0537	1.184	1.2433	0.949	1.1356		0.109916	0.022717	0.0733517	0.0945759	-0.0227338	0.0552254			8.3985	2.50181	3.97589	6.14734	2.50316	1.55955		7.27292	2.50248
							Mean	0.0259308	-0.00230108	0.0335928	0.0331025	0.00229781	0.0396298	Mean
							Median	0.0343477	-0.000478006	0.0381231	0.0303162	0.000477442	0.0447147	Median
							SD	0.0899688	0.029303	0.0871451	0.0849665	0.0293019	0.0864225	SD
							Var	0.00809438	0.000858666	0.00759426	0.00721931	0.0008586	0.00746885	Var
							Min	-0.209574	-0.0863981	-0.196202	-0.197432	-0.0744816	-0.180522	Min
							Max	0.189855	0.0744873	0.189266	0.190668	0.0863598	0.181386	Max
							Range	0.399429	0.160885	0.385467	0.388099	0.160841	0.361908	Range

## Sheet: Sheet2
Proteins	PE (115:114)	Nor (116:114)	PE(117:114)	PE (115:116)	Nor (114:116)	PE (117:116)
Fibrinogen Fragment D	1.4971	1.0035	1.4867	1.41	0.9965	1.4962
Clusterin isoform 2	1.4957	1.0317	1.4356	1.4134	0.9693	1.4306
Apolipoprotein A-I	1.5373	1.0679	1.4962	1.4512	0.9364	1.4184
Fibronectin	1.3373	1.0679	1.3962	1.3512	0.9364	1.3184
Angiotensinogen preproprotein	1.4189	0.9682	1.4439	1.4645	1.0328	1.498
Galectin 3 binding protein	1.4016	0.9698	1.4538	1.4457	1.0312	1.4031
Plasminogen	1.5483	0.9274	1.5131	1.5512	1.0783	1.5063
Transferrin	1.3086	1.007	1.3514	1.3102	0.993	1.3512
Complement component 4	1.5473	1.0679	1.5462	1.5412	0.9364	1.5184
Hemopexin	1.5373	1.0679	1.4962	1.4512	0.9364	1.4184
